# Supplementary material for: Synthesis of diazahexathia-24-crown-8 derivatives and structures of Ag+ complexes
Source: Royal Society of Chemistry journal article supplement (doi:10.1039/b513293b), 2006-01-01

## Electronic Supplementary Information

### Synthesis of Diazahexathia-24-crown-8 Derivatives and Structures of Ag<sup>+</sup> Complexes

Yoichi Habata,<sup>\*†‡</sup> Joobeom Seo,<sup>§</sup> Satoshi Otawa,<sup>†</sup> Futoshi Osaka,<sup>†</sup> Kanae Noto,<sup>†</sup> and Shim Sung Lee<sup>§</sup>

Department of Chemistry, Faculty of Science, Toho University, 2-2-1 Miyama, Funabashi, Chiba 274-8510, Japan, Research Center for Materials with Integrated Properties, Toho University, 2-2-1 Miyama, Funabashi, Chiba 274-8510, and Department of Chemistry, Gyeongsung National University, Chinju 660-701, S. Korea

habata@chem.sci.toho-u.ac.jp

#### Table of Contents

|                                                                                     |         |
|-------------------------------------------------------------------------------------|---------|
| <sup>1</sup> H NMR spectrum of <b>2</b>                                             | Page S2 |
| <sup>1</sup> H NMR spectra of <b>3</b> and <b>4</b>                                 | Page S3 |
| <sup>1</sup> H NMR spectra of <b>5a</b> and <b>5b</b>                               | Page S4 |
| FAB MS of AgOTf complexes with <b>5a</b> and <b>5b</b> ( <i>m</i> -NBA as a matrix) | Page S5 |
| ORTEP diagram of <b>3</b> ( <i>N</i> -Boc-protected monoazatrithia-12-crown-4)      | Page S6 |

A partial  $^1\text{H}$  NMR spectrum of diazahexathia 24-crown-8 (**2**) (in  $\text{CDCl}_3$ ).

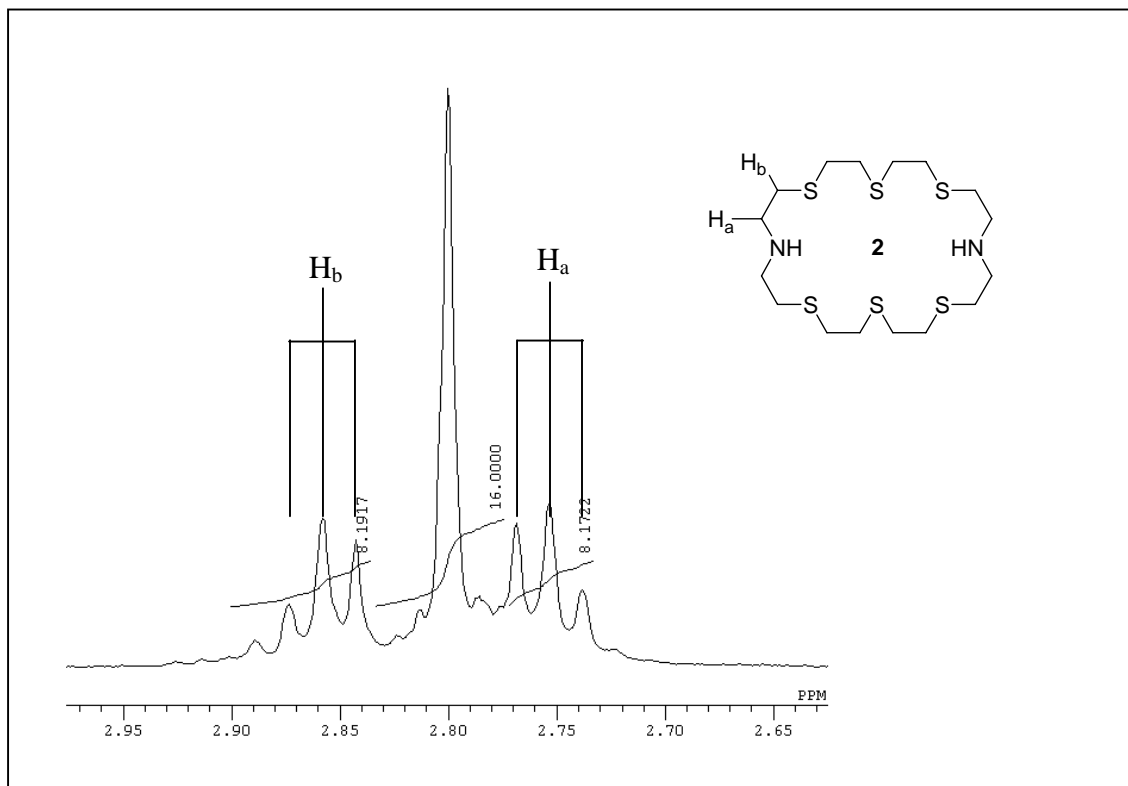

$^1\text{H}$  NMR spectrum (400 MHz) of *N*-Boc-protected monoazatrithia 12-crown-4 (**3**) (in  $\text{CDCl}_3$ ).

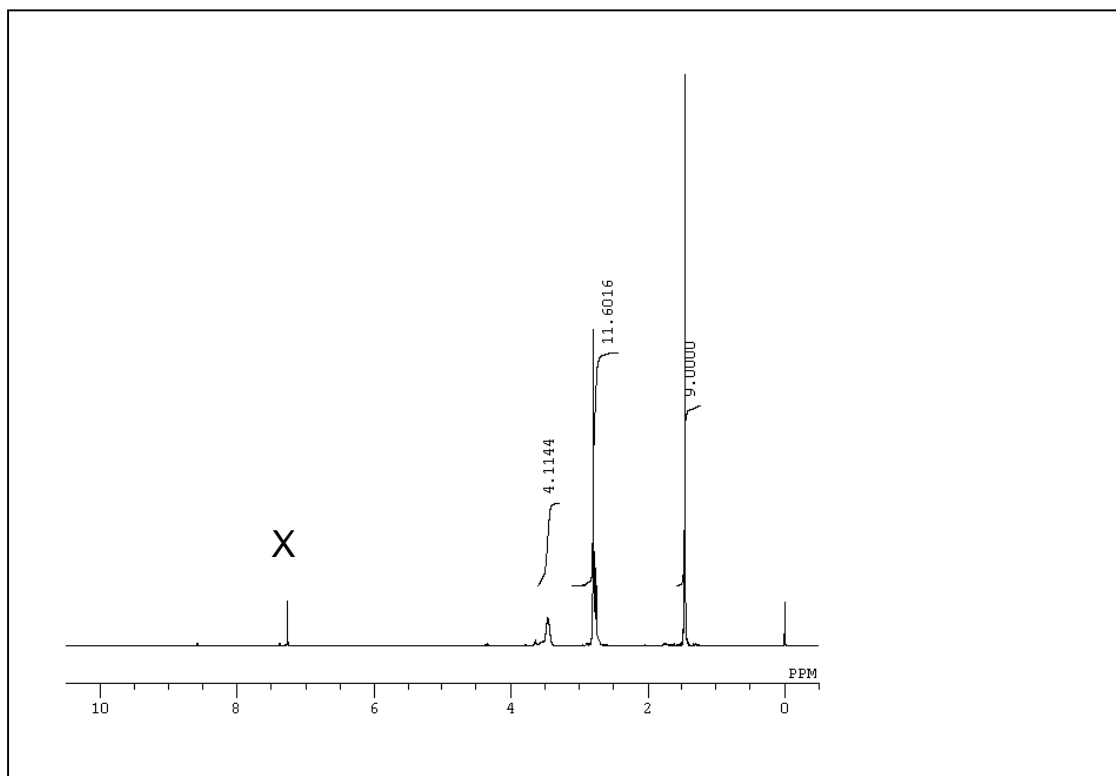

$^1\text{H}$  NMR spectrum (400 MHz) of *N,N'*-diBoc-protected diazahexathia 24-crown-8 (**4**) (in  $\text{CDCl}_3$ ).

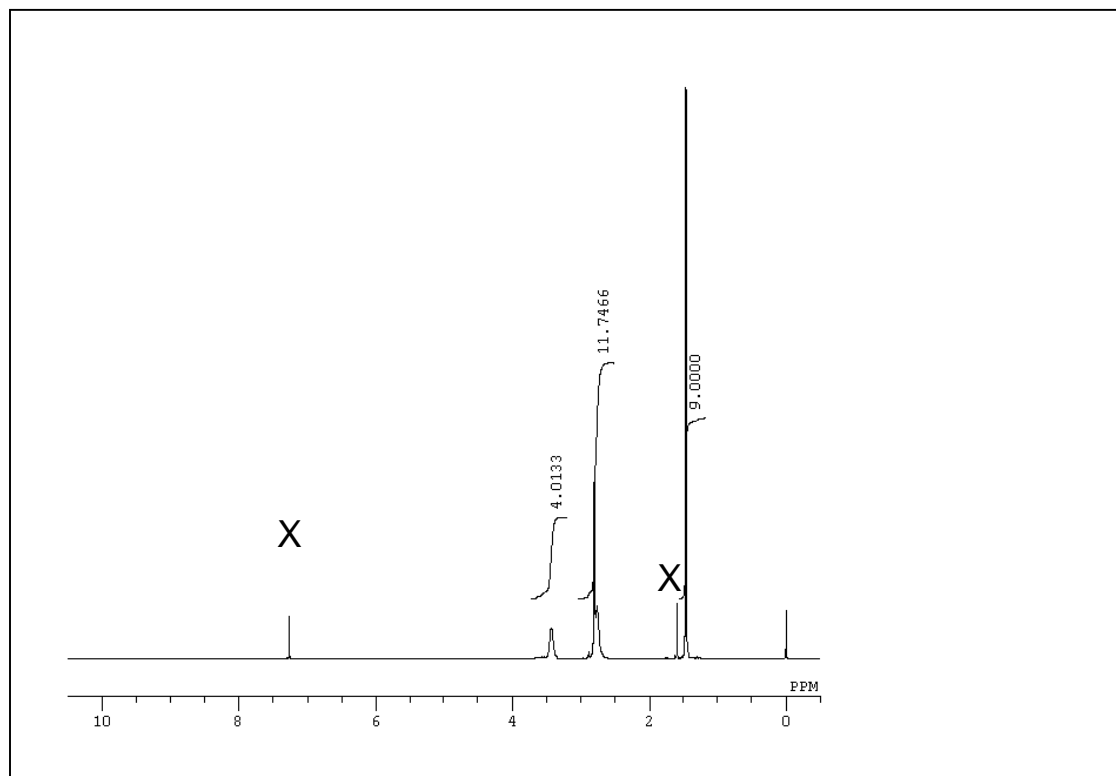

$^1\text{H}$  NMR spectrum (400 MHz) of **5a** (in  $\text{CD}_2\text{Cl}_2/\text{CD}_3\text{OD}$ ).

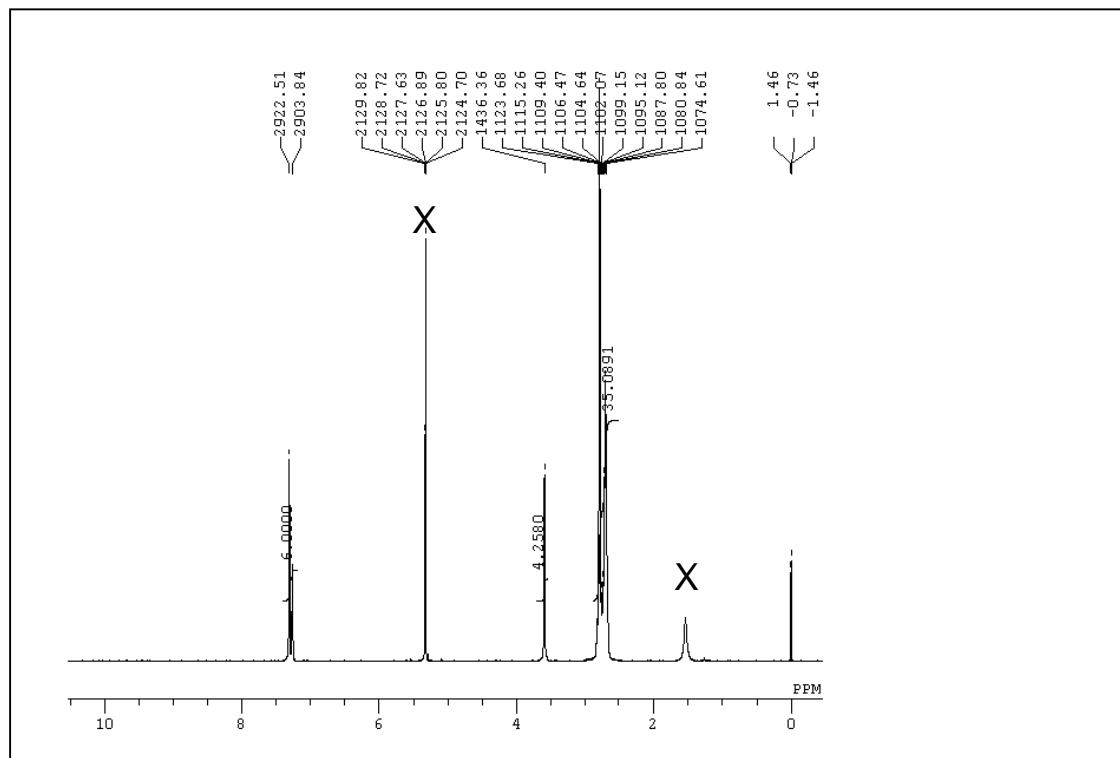

$^1\text{H}$  NMR spectrum (400 MHz) of **5b** (in  $\text{CD}_2\text{Cl}_2/\text{CD}_3\text{OD}$ ).

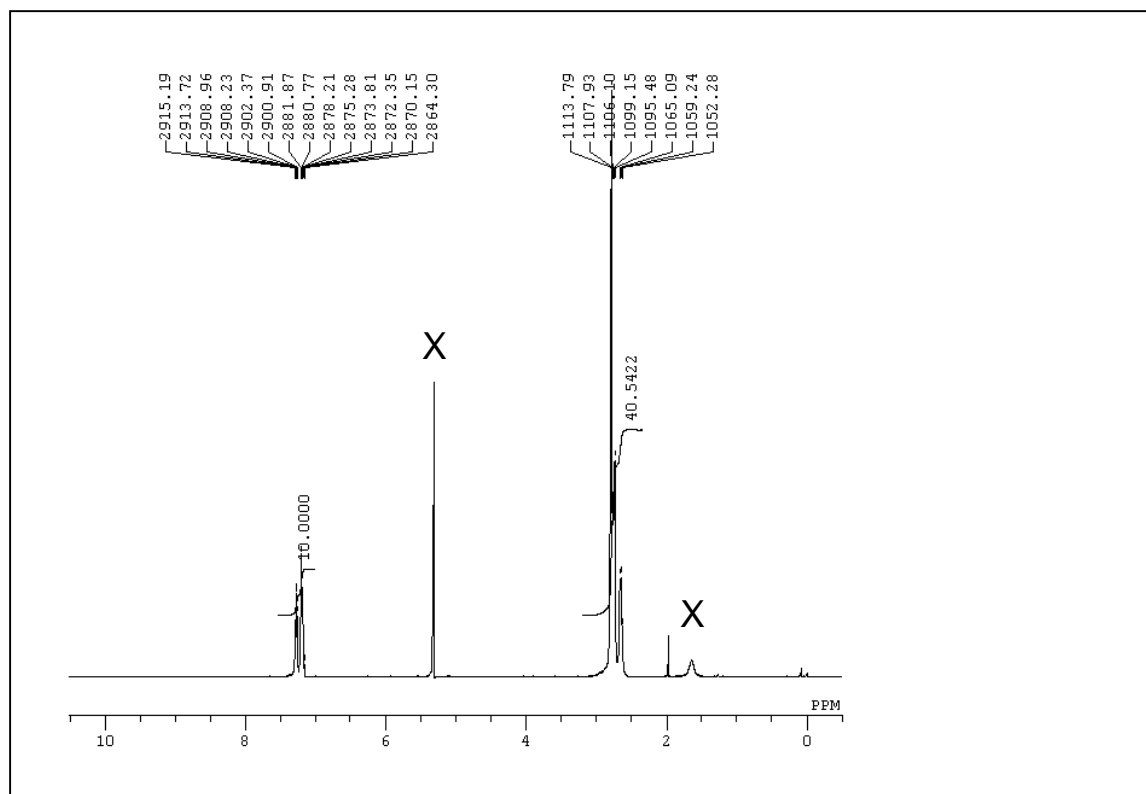

FAB MS of AgOTf complexes with **5a** and **5b** (*m*-NBA as a matrix)

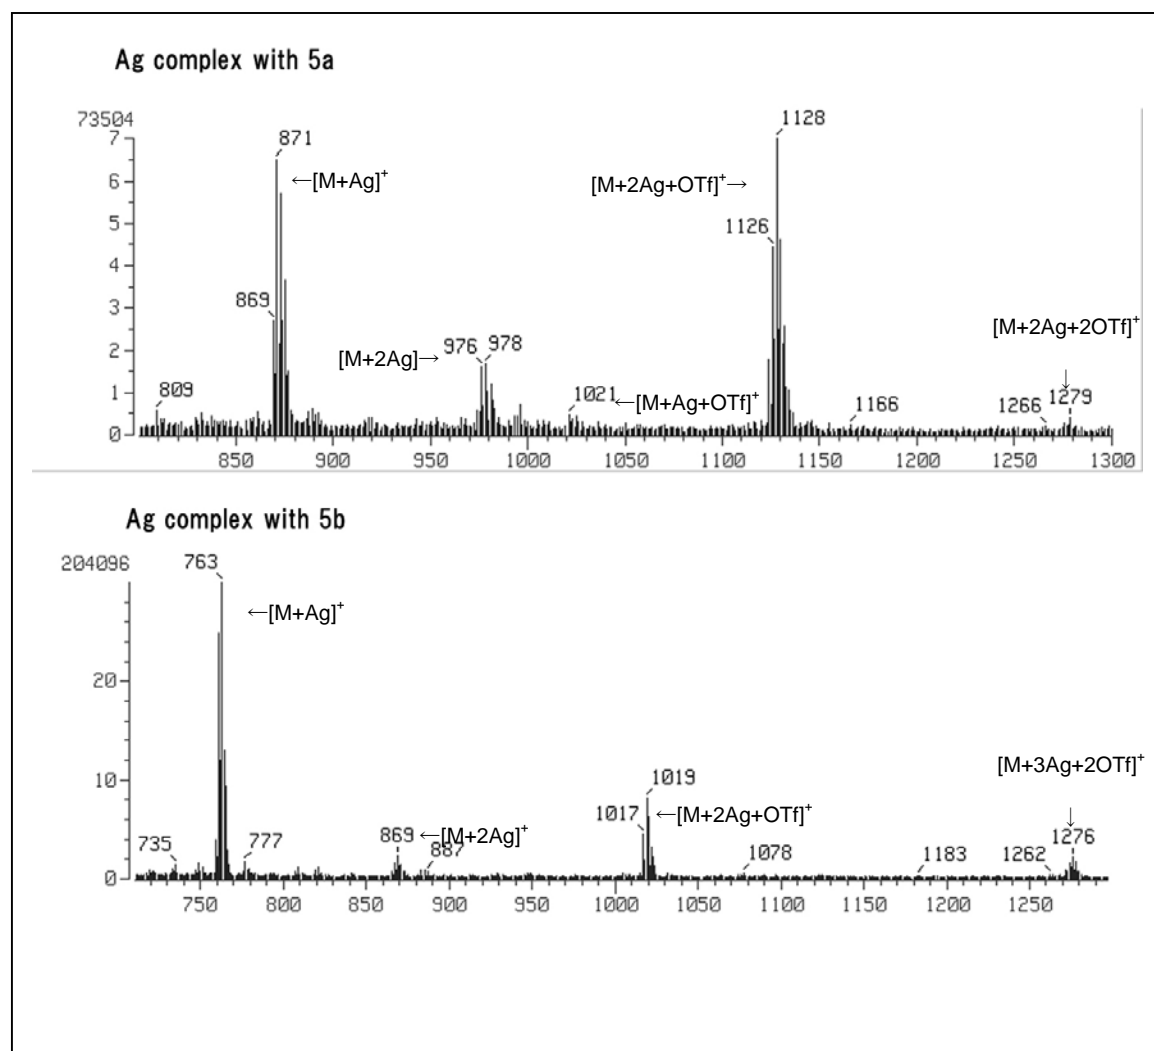

ORTEP diagram of **3** (*N*-Boc-protected monoazatrithia-12-crown-4).

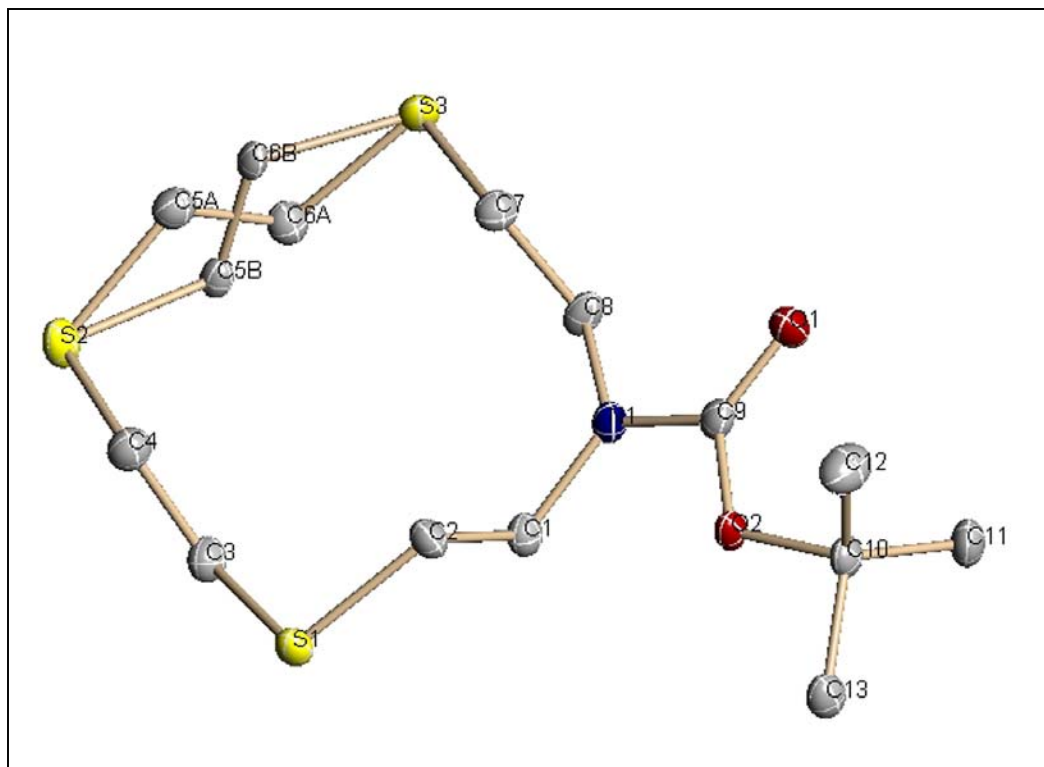

Supplement: b513293b.pdf [file b513293b.pdf]
